# Supplementary material for: Triplet exciton recycling of a phosphorescent emitter by an up-conversion process using a delayed fluorescence type low triplet energy host material
Source: Royal Society of Chemistry journal article supplement (doi:10.1039/c5tc04028k), 2016-01-01
Supplement: c5tc04028k1.pdf [file c5tc04028k1.pdf]

**Supporting information**

**Triplet exciton recycling of phosphorescent emitter by up-conversion process using  
delayed fluorescent type low triplet energy host material**

**Sang Kyu Jeon<sup>a</sup>, Chan Seok Oh<sup>a</sup>, Mounngon Kim<sup>b</sup> and Jun Yeob Lee<sup>a\*</sup>**

## Experimental section

### General procedure

All purchased commercial reagents and solvents were used without further purification. Sodium hydride and dimethylformamide (DMF) were purchased from Sigma Aldrich. The <sup>1</sup>H NMR were recorded in CDCl<sub>3</sub> at JEOL 400 (400 MHz) spectrometer. LC(liquid chromatography)-MS spectrometry was carried out using Agilent Technology 6120 LC/MS spectrometer.

### Synthesis of 9,9'-(5-(4,6-diphenyl-1,3,5-triazin-2-yl)-1,3-phenylene)bis(carbazole-3-carbonitrile), (DCzCNTrz)

2-(3,5-Difluorophenyl)-4,6-diphenyl-1,3,5-triazine (0.80 g, 2.29 mmol) and 9*H*-carbazole-3-carbonitrile (0.98 g, 5.05 mmol) were dissolved in DMF (30 ml) under a pure nitrogen atmosphere. Sodium hydride (0.37 g, 9.17 mmol) was dissolved in the mixture and the reaction mixture was stirred at 60 °C for 1 day. The reaction mixture was filtered with methanol and distilled water. The white product was obtained in 0.81 g (51% yield) and 0.56 g of the product was further purified by sublimation.

<sup>1</sup>H NMR (400 MHz, CDCl<sub>3</sub>): 9.13 (d, J=2.00 Hz, 2H), 8.73 (d, J=2.00 Hz, 2H), 8.53 (s, 2H), 8.27 (d, J=4.00 Hz, 2H), 7.92 (s, 2H), 7.78-7.44 (m, 15H) LC-MS *m/z* 688 [(M)<sup>+</sup>]

List of figure

Figure S1. Synthesis scheme of 2-(3,5-difluorophenyl)-4,6-diphenyl-1,3,5-triazine and 9*H*-carbazole-

Figure S2. UV-vis absorption, room temperature PL and low temperature PL spectra of DCzTrz, TrzmPCz, DCzCNTrz.

Figure S3. Single carrier current density data of DCzTrz and mCP.

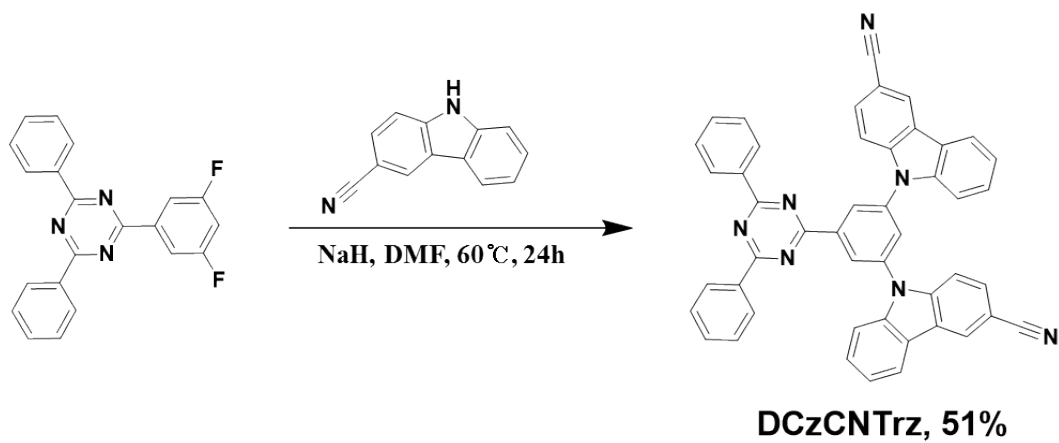

Figure S1.

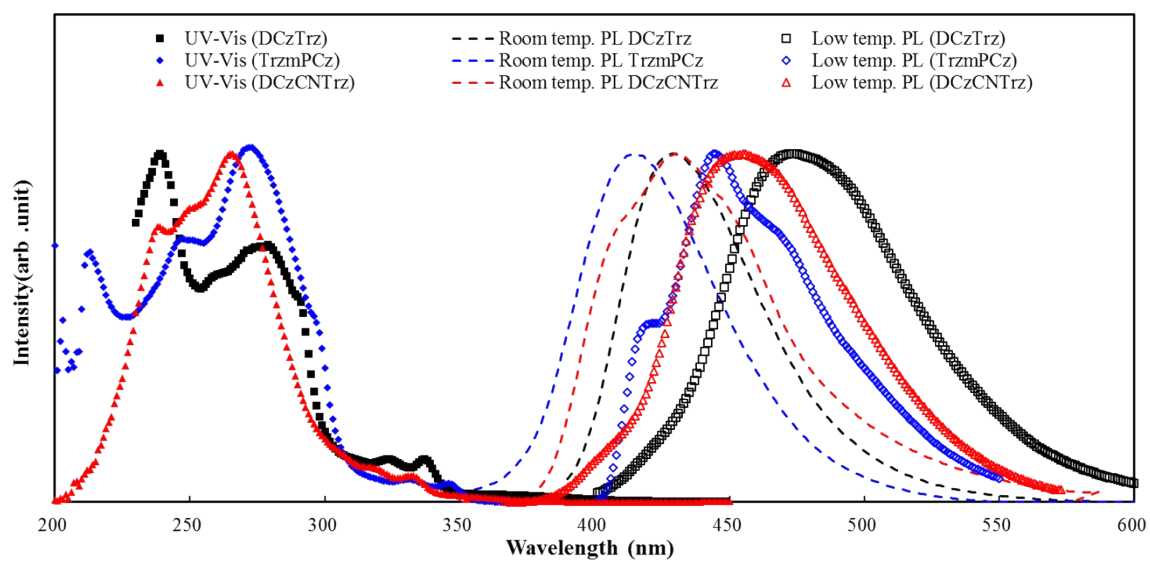

Figure S2.

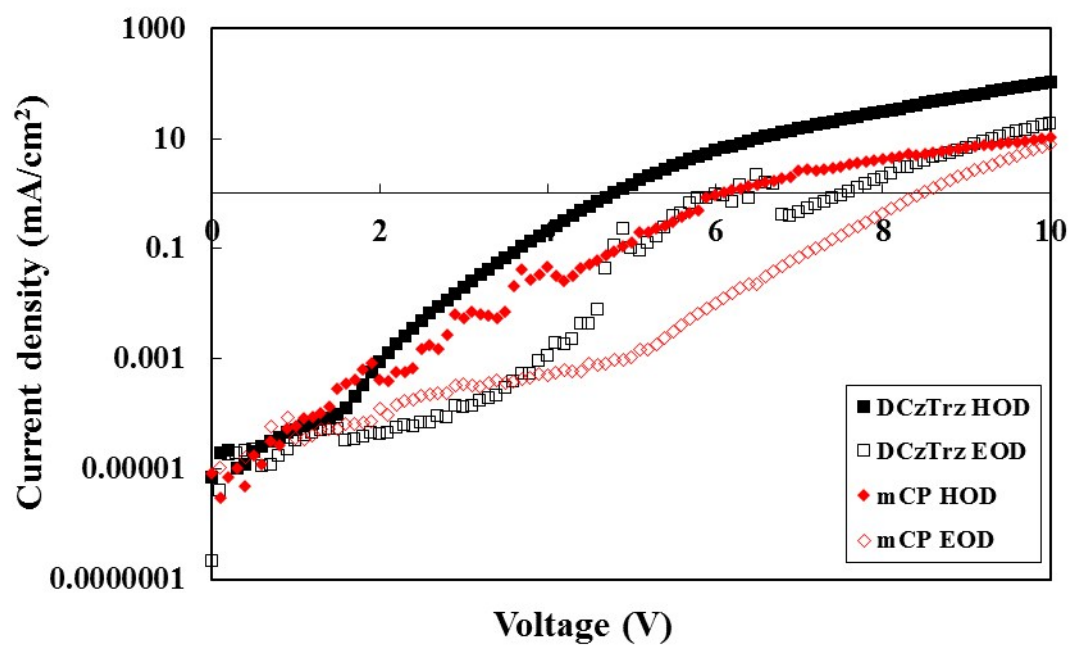

Figure S3.
